# Supplementary material for: Clinical Utility of a Tamil SIN Test in Tinnitus with Normal Audiograms: Insights from Behavioral and Electrophysiological Measures
Source: Research Square preprint supplement (doi:10.21203/rs.3.rs-7146156/v1), 2025-08-25
Supplement: Supplementary file 1 [file 88a902fae0adc73de6000b27.docx]

# Supplementary Material

This supplementary material includes the following:

1. Tamil Speech-in-Noise (SIN) Test Lists used for behavioral testing.
2. Translated Tamil version of the Tinnitus Handicap Inventory (THI).

These materials are available upon request from the corresponding author:
Email: arunkumar44427@gmail.com

Note: The SIN test lists and THI translation were developed following cultural and linguistic adaptation protocols to ensure reliability and clinical relevance for Tamil-speaking populations.
